# Supplementary figures and images for: No distinct microbiome signature of irritable bowel syndrome found in a Swedish random population
Source: PubMed Central journal article supplement — Gut. 2019 Oct 10;69(6):1076–84. doi: 10.1136/gutjnl-2019-318717 (PMC7282555; doi:10.1136/gutjnl-2019-318717), 2019-10-10

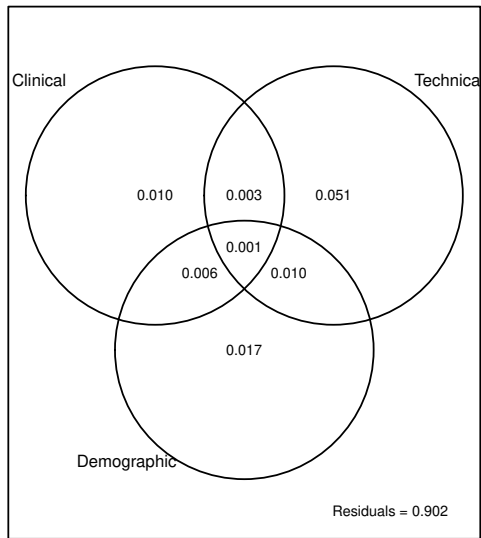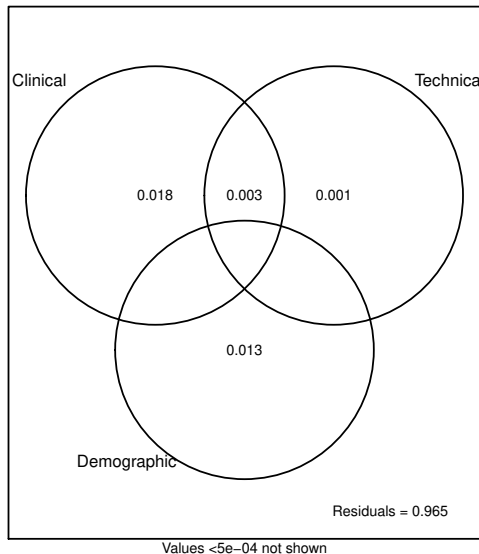

Supplement: gutjnl-2019-318717supp001.pdf [file gutjnl-2019-318717supp001.pdf]

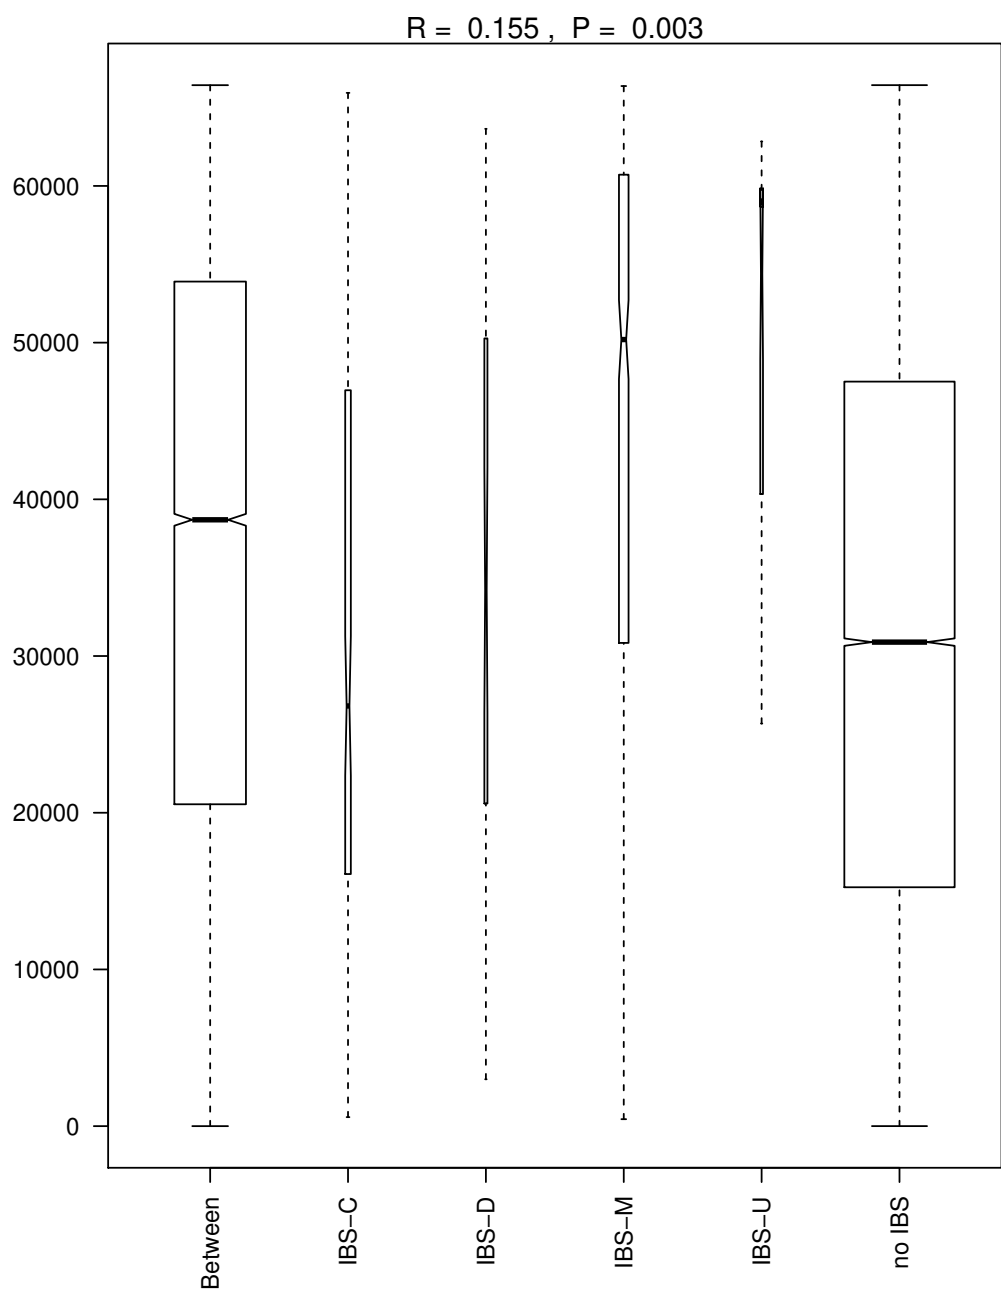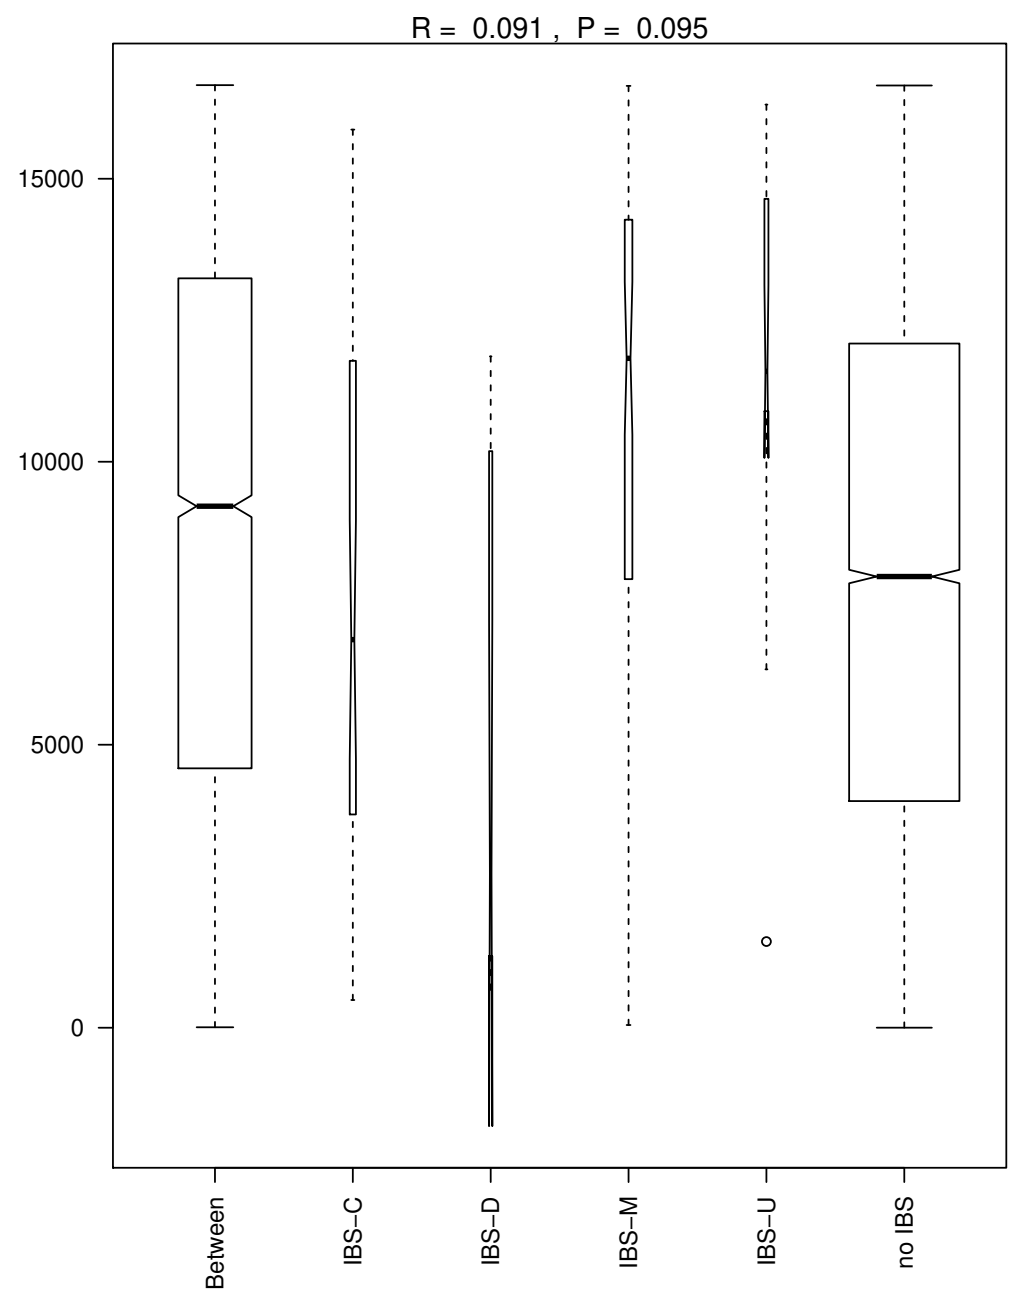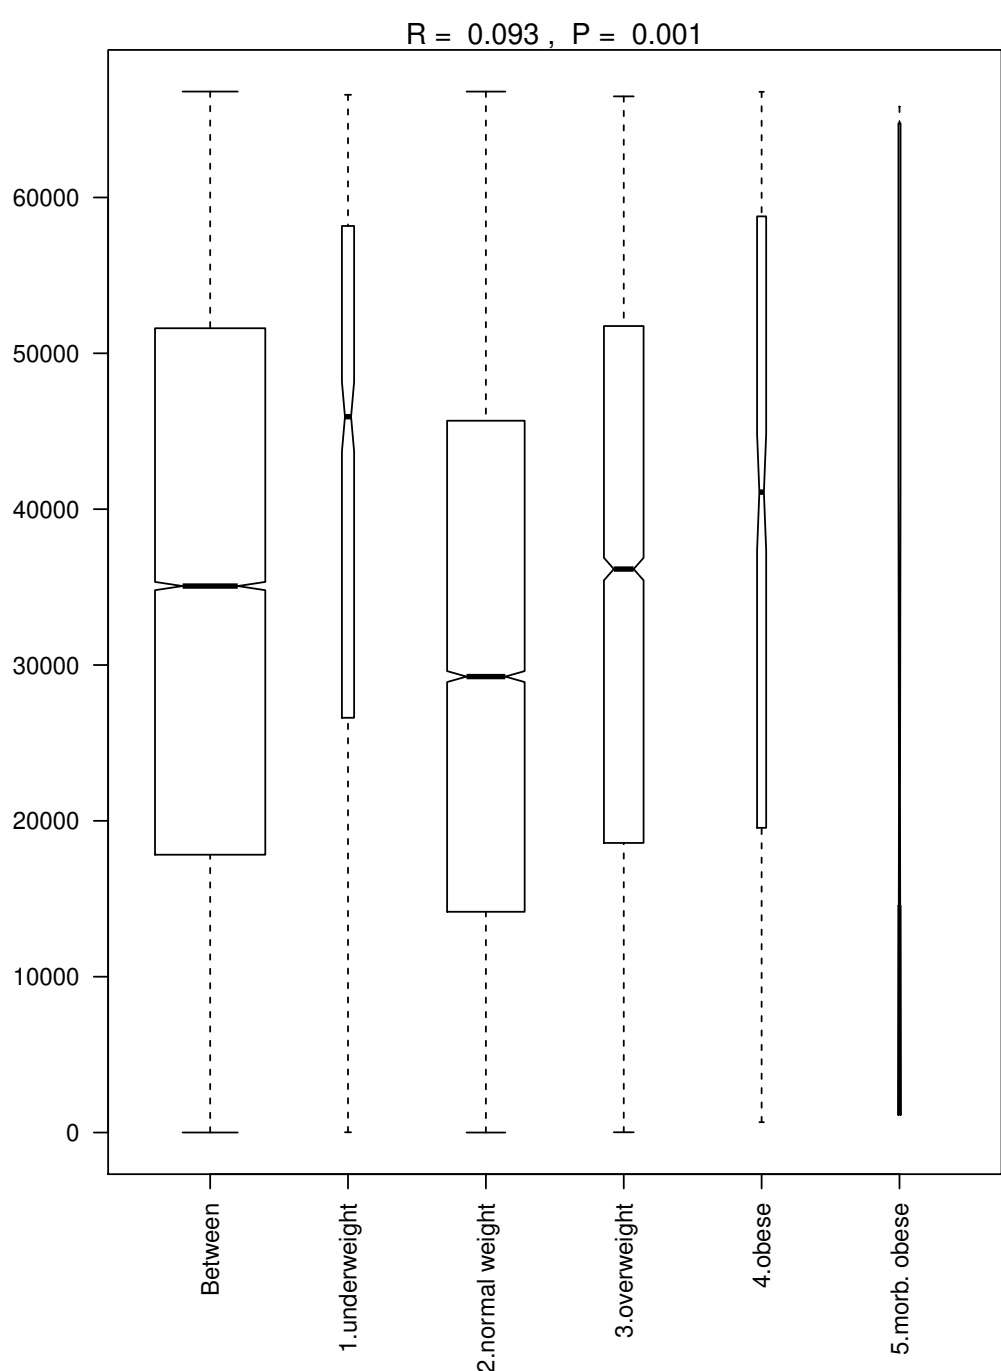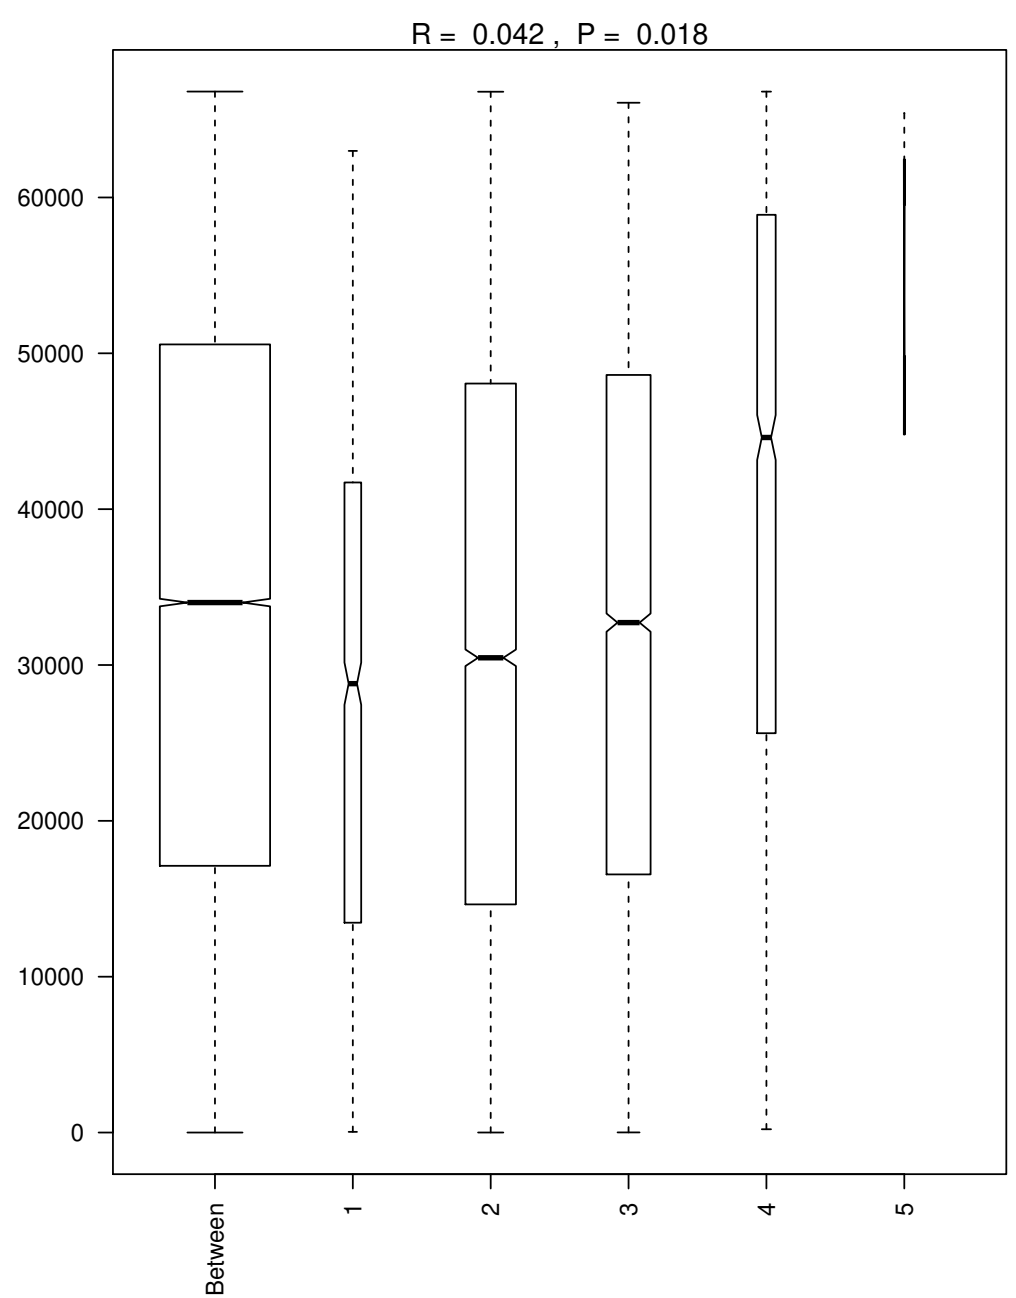

Supplement: gutjnl-2019-318717supp002.pdf [file gutjnl-2019-318717supp002.pdf]

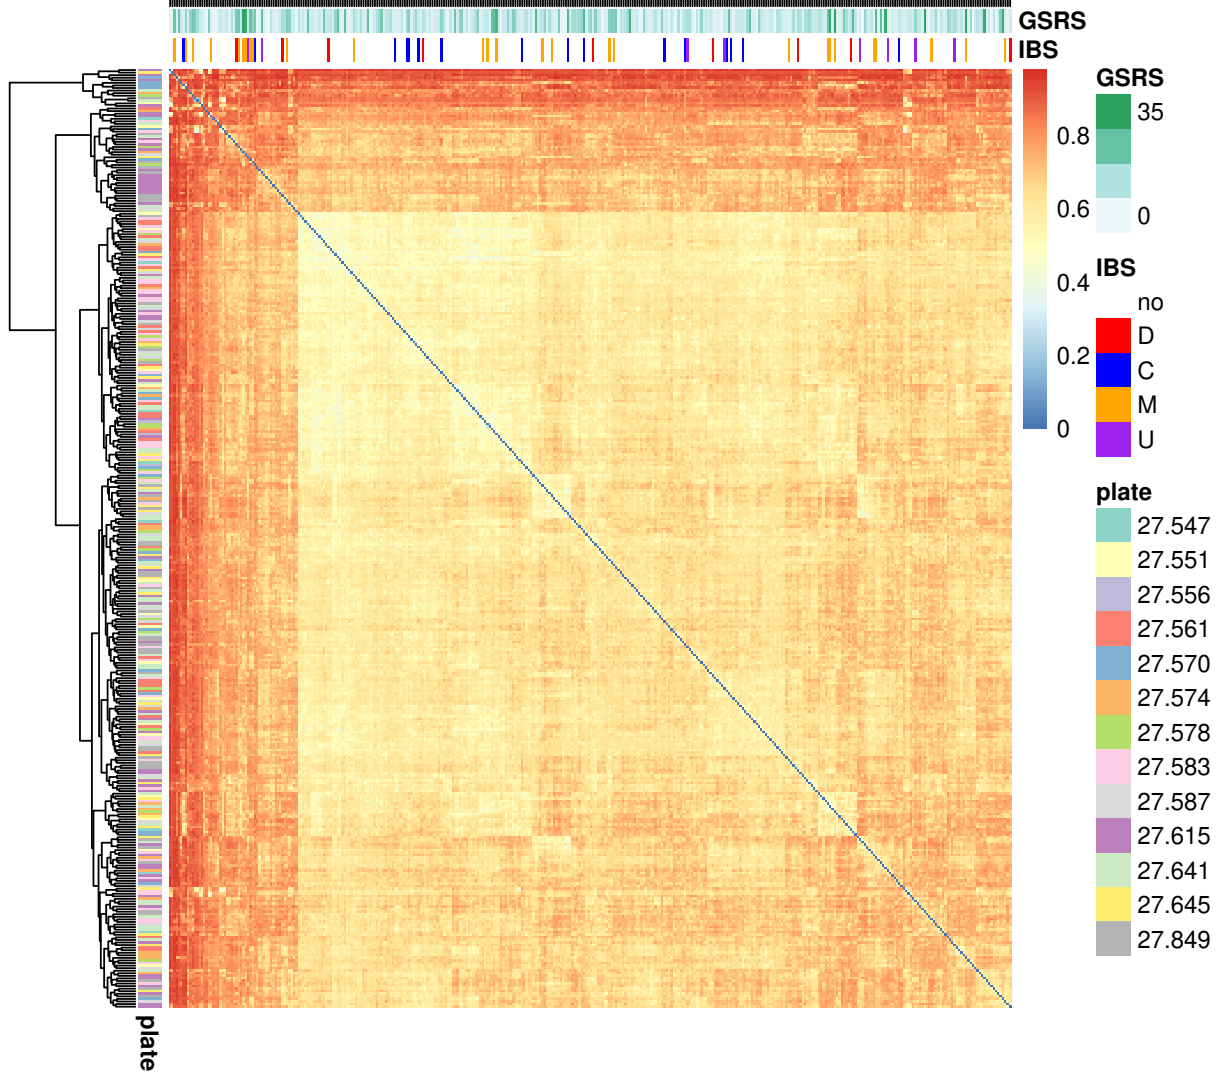

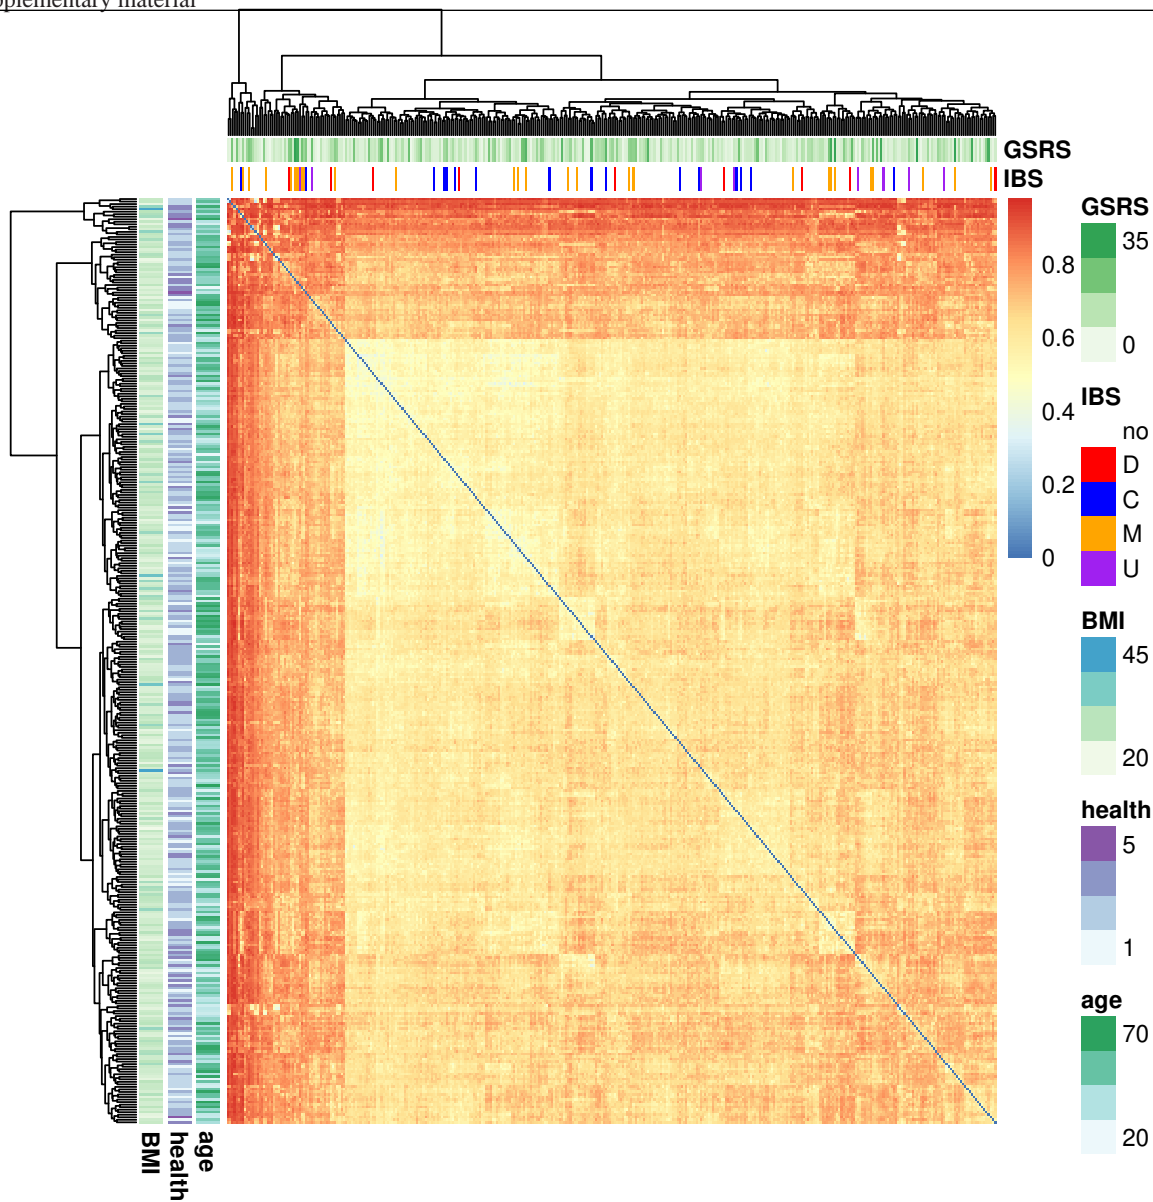

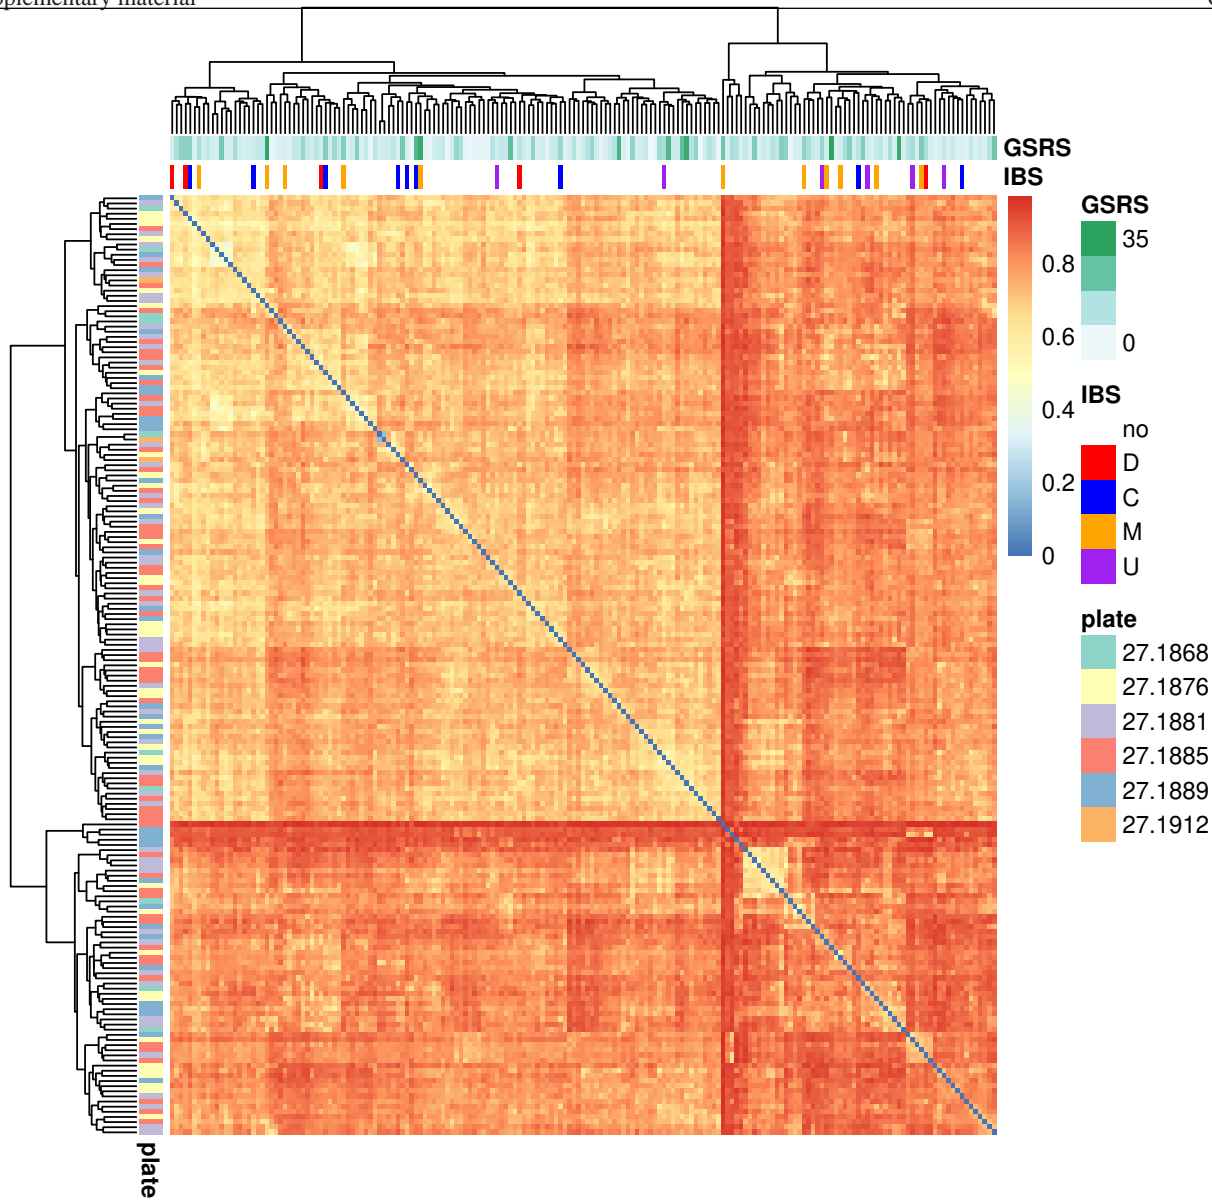

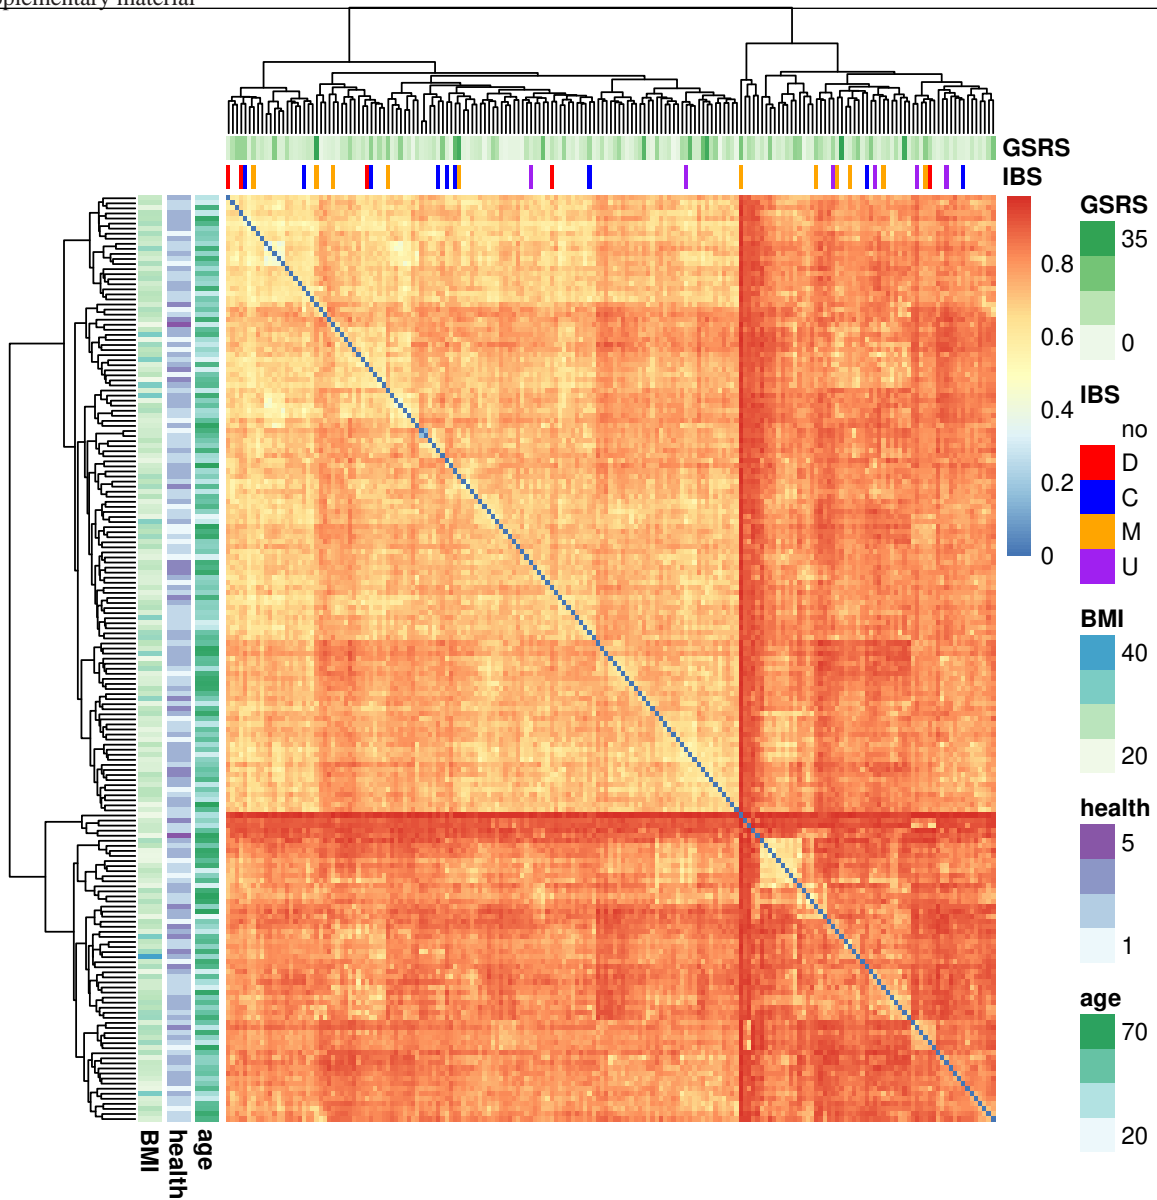

Supplement: gutjnl-2019-318717supp003.pdf [file gutjnl-2019-318717supp003.pdf]

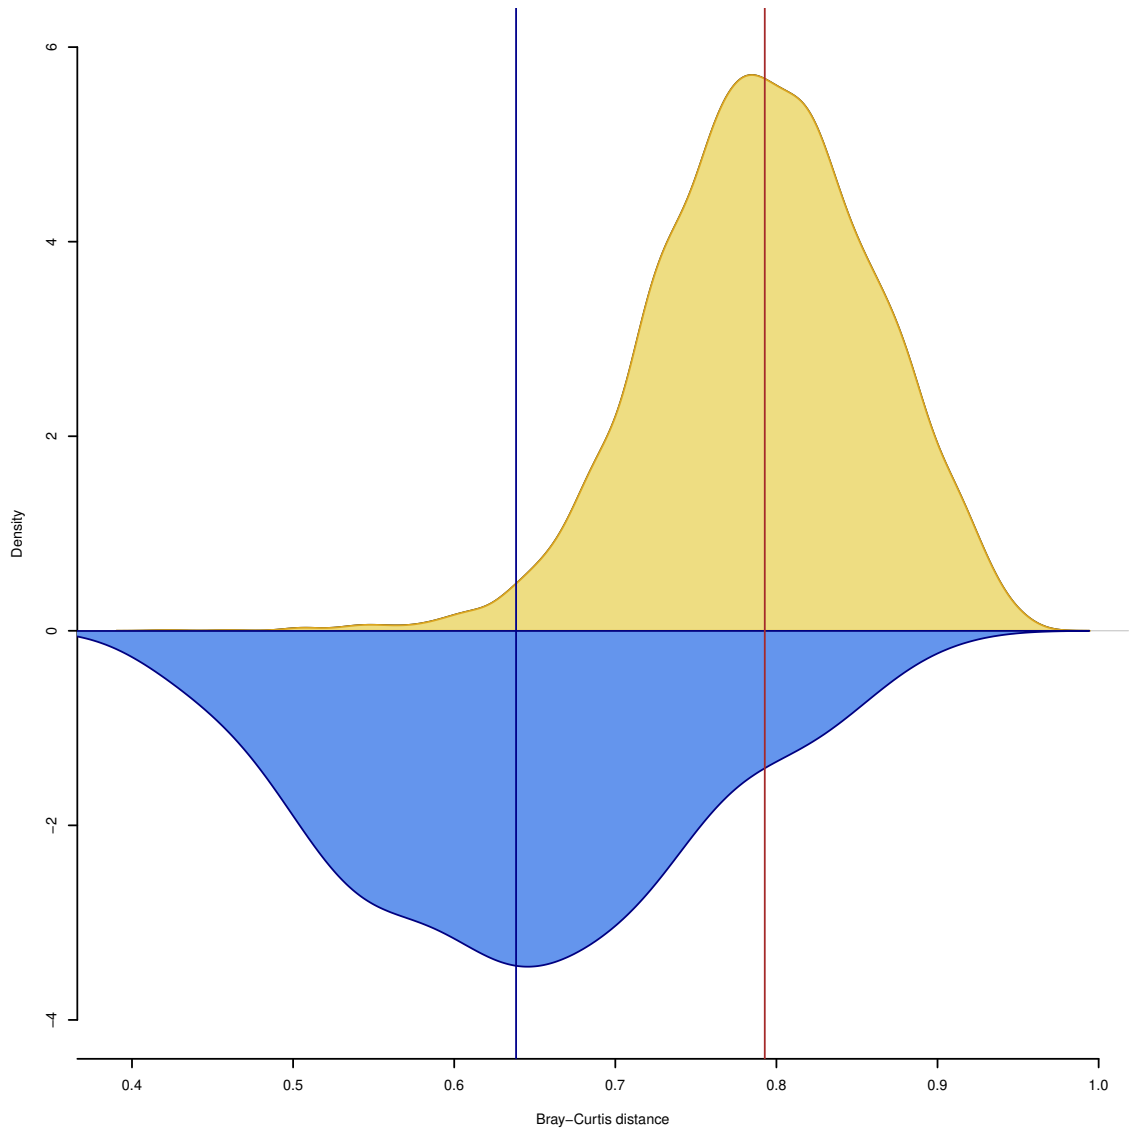

Supplement: gutjnl-2019-318717supp004.pdf [file gutjnl-2019-318717supp004.pdf]
